# Supplementary material for: High-risk HPV genotypes in Zimbabwean women with cervical cancer: Comparative analyses between HIV-negative and HIV-positive women
Source: PubMed Central journal article supplement (PMC8478215; doi:10.1371/journal.pone.0257324), 2021-09-28
Supplement: pone.0257324.s001.pdf [file pone.0257324.s001.pdf]

|              | Odds ratio | 95% CI      | P value |
|--------------|------------|-------------|---------|
| <b>HPV16</b> |            |             |         |
| Age          | 1.0        | 0.9 – 1.0   | 0.686   |
| Sexual debut | 0.8        | 0.6 - 1.2   | 0.304   |
| Parity       | 1.7        | 0.8 – 3.6   | 0.146   |
| STI history  | 0.7        | 0.1 – 7.7   | 0.751   |
| HIV          | 1.0        | 0.6 – 1.5   | 0.839   |
| <b>HPV18</b> |            |             |         |
| Age          | 12.5       | -13 – 38    | 0.333   |
| Sexual debut | -6.7       | -22 – 9     | 0.398   |
| Parity       | 1.3        | 0.5 – 3.5   | 0.627   |
| STI history  | 0.2        | -0.0 – 0.09 | 0.489   |
| HIV          | 1.2        | 0.8 – 1.9   | 0.446   |
| <b>HPV31</b> |            |             |         |
| Age          | 1.0        | 1.0 – 1.1   | 0.808   |
| Sexual debut | 0.9        | 0.7 – 1.1   | 0.340   |
| Parity       | 0.8        | 0.6 – 1.0   | 0.063   |
| STI history  | 2.3        | 0.8 – 6.3   | 0.117   |
| HIV          | 0.8        | 0.3 – 2.3   | 0.664   |
| <b>HPV33</b> |            |             |         |
| Age          | 1.0        | 0.9 – 1.0   | 0.391   |
| Sexual debut | 1.0        | 0.8 – 1.2   | 0.746   |
| Parity       | 1.0        | 0.8 – 1.3   | 0.668   |
| STI history  | 1.2        | 0.5 – 3.0   | 0.684   |
| HIV          | 0.4        | 0.2 – 1.1   | 0.079   |
| <b>HPV35</b> |            |             |         |
| Age          | 1.2        | 0.9 – 1.5   | 0.341   |
| Sexual debut | 0.7        | 0.3 – 1.4   | 0.312   |
| Parity       | 1.0        | -4.0 – 6.0  | 0.683   |
| STI history  | 0.0        | -0.0 – 0.10 | 0.576   |
| HIV          | 0.8        | 0.5 – 1.3   | 0.447   |
| <b>HPV39</b> |            |             |         |
| Age          | 1.0        | 1.0 – 1.1   | 0.307   |
| Sexual debut | 1.2        | 0.9 – 1.4   | 0.148   |
| Parity       | 1.0        | 0.7 – 1.3   | 0.761   |
| STI history  | 1.4        | 0.4 – 5.1   | 0.649   |
| HIV          | 2.1        | 0.5 – 8.8   | 0.295   |
| <b>HPV45</b> |            |             |         |
| Age          | 1.1        | 0.82 – 1.44 | 0.551   |
| Sexual debut | 0.9        | 0.60 – 1.24 | 0.414   |
| Parity       | 1.2        | 0.45 – 3.39 | 0.681   |

|                          |      |              |       |
|--------------------------|------|--------------|-------|
| <b>STI history</b>       | 0.3  | -0.76 – 1.33 | 0.566 |
| <b>HIV</b>               | 1.1  | 0.4 – 2.8    | 0.854 |
| <b>HPV51</b>             |      |              |       |
| <b>Age</b>               | 1.1  | 0.88 -1.31   | 0.480 |
| <b>Sexual debut</b>      | 0.7  | 0.25 – 1.7   | 0.374 |
| <b>Parity</b>            | 1.1  | 0.36 – 3.54  | 0.834 |
| <b>STI history</b>       | 1.0  | -0.24 – 0.52 | 0.424 |
| <b>HIV</b>               | 1.9  | 0.7 - 4.7    | 0.179 |
| <b>HPV52</b>             |      |              |       |
| <b>Age</b>               | 1.1  | 0.85 – 1.52  | 0.382 |
| <b>Sexual debut</b>      | 0.9  | 0.50 – 1.50  | 0.579 |
| <b>Parity</b>            | 0.5  | 0.09 – 3.18  | 0.487 |
| <b>STI history</b>       | 0.3  | -0.21 – 0.71 | 0.242 |
| <b>HIV</b>               | 0.8  | 0.2 – 2.9    | 0.731 |
| <b>HPV58</b>             |      |              |       |
| <b>Age</b>               | 1.0  | 1.0 – 1.1    | 0.209 |
| <b>Sexual debut</b>      | 1.0  | 0.9 – 1.2    | 0.800 |
| <b>Parity</b>            | 1.0  | 0.8 – 1.2    | 0.661 |
| <b>STI history</b>       | 0.8  | 0.3 – 2.0    | 0.573 |
| <b>HIV</b>               | 2.5  | 1.0 – 6.2    | 0.051 |
| <b>HPV58</b>             |      |              |       |
| <b>Age</b>               | 1.1  | 0.86 – 1.44  | 0.419 |
| <b>Sexual debut</b>      | 0.7  | 0.25 – 1.67  | 0.374 |
| <b>Parity</b>            | 1.1  | 0.44 – 2.79  | 0.822 |
| <b>STI history</b>       | 0.0  | -0.14 – 0.23 | 0.611 |
| <b>HIV</b>               | 1.6  | 0.8 – 3.4    | 0.194 |
| <b>HPV59</b>             |      |              |       |
| <b>Age</b>               | 0.1  | -0.08 – 0.24 | 0.198 |
| <b>Sexual debut</b>      | 1.0  | 0.88 – 1.22  | 0.650 |
| <b>Parity</b>            | -0.8 | -2.53 – 1.03 | 0.272 |
| <b>STI history</b>       | 0.7  | -0.70 – 2.03 | 0.219 |
| <b>HIV</b>               | 3.7  | 0.4 – 35.72  | 0.262 |
| <b>HPV66<sup>a</sup></b> |      |              |       |
| <b>Age</b>               | 1.1  | 0.81 – 1.57  | 0.473 |
| <b>Sexual debut</b>      | 1.0  | 0.81 – 1.21  | 0.959 |
| <b>Parity</b>            | 1.0  | -0.31 – 0.54 | 0.369 |
| <b>HIV</b>               | 1.2  | 0.1 – 19.47  | 0.894 |
| <b>HPV68</b>             |      |              |       |
| <b>Age</b>               | 1.1  | 0.83 – 1.39  | 0.594 |
| <b>Sexual debut</b>      | 1.1  | 0.91 – 1.29  | 0.382 |
| <b>Parity</b>            | 1.2  | 0.49 – 2.94  | 0.685 |
| <b>STI history</b>       | 0.3  | -0.61 – 1.28 | 0.420 |

|                                 |     |             |       |
|---------------------------------|-----|-------------|-------|
| <b>HIV</b>                      | 1.5 | 0.40 – 5.79 | 0.535 |
| <b>Number of HPV infections</b> |     |             |       |
| <b>Age</b>                      | 1.0 | 0.95 – 1.04 | 0.802 |
| <b>Sexual debut</b>             | 0.9 | 0.82 – 1.01 | 0.085 |
| <b>Parity</b>                   | 1.0 | 0.76 – 1.20 | 0.690 |
| <b>STI history</b>              | 0.5 | 0.14 – 1.62 | 0.239 |
| <b>HIV</b>                      | 1.5 | 0.42 – 5.13 | 0.545 |

**Note:** STI, sexually transmitted infection; CI, confidence interval; a – no individual with HPV genotype had STI history
