# Supplementary material for: High-risk HPV genotypes in Zimbabwean women with cervical cancer: Comparative analyses between HIV-negative and HIV-positive women
Source: PubMed Central journal article supplement (PMC8478215; doi:10.1371/journal.pone.0257324), 2021-09-28
Supplement: pone.0257324.s002.pdf [file pone.0257324.s002.pdf]

**S2 Table. The number of individuals harbouring specific HPV genotypes stratified by HIV status.**

| HPV genotype | HIV status | Number of HPVs (n) |    |    |    |    |   |
|--------------|------------|--------------------|----|----|----|----|---|
|              |            | 1 *                | 2  | 3  | 4  | 5  | 6 |
| 16           | -          | 19                 | 18 | 5  | 1  | 0  | 0 |
|              | +          | 15                 | 13 | 3  | 1  | 1  | 0 |
| 18           | -          | 13                 | 12 | 1  | 0  | 1  | 1 |
|              | +          | 6                  | 13 | 1  | 0  | 0  | 0 |
| 31           | -          | 1                  | 0  | 1  | 2  | 0  | 0 |
|              | +          | 1                  | 0  | 0  | 0  | 0  | 1 |
| 33           | -          | 2                  | 0  | 1  | 2  | 0  | 0 |
|              | +          | 2                  | 0  | 0  | 0  | 0  | 0 |
| 35           | -          | 15                 | 15 | 3  | 0  | 1  | 0 |
|              | +          | 3                  | 10 | 3  | 0  | 1  | 1 |
| 39           | -          | 0                  | 2  | 0  | 1  | 0  | 0 |
|              | +          | 0                  | 1  | 0  | 0  | 0  | 0 |
| 45           | -          | 1                  | 0  | 2  | 3  | 0  | 0 |
|              | +          | 0                  | 0  | 1  | 1  | 0  | 0 |
| 51           | -          | 0                  | 0  | 1  | 0  | 1  | 0 |
|              | +          | 1                  | 1  | 1  | 1  | 1  | 1 |
| 52           | -          | 1                  | 2  | 1  | 0  | 0  | 0 |
|              | +          | 0                  | 3  | 1  | 0  | 0  | 1 |
| 56           | -          | 0                  | 0  | 0  | 1  | 0  | 0 |
|              | +          | 0                  | 0  | 1  | 0  | 1  | 0 |
| 58           | -          | 0                  | 2  | 1  | 1  | 1  | 0 |
|              | +          | 0                  | 2  | 0  | 0  | 1  | 0 |
| 59           | -          | 0                  | 0  | 0  | 2  | 0  | 0 |
|              | +          | 2                  | 0  | 1  | 1  | 0  | 0 |
| 66           | -          | 0                  | 0  | 0  | 1  | 0  | 0 |
|              | +          | 0                  | 0  | 1  | 0  | 0  | 0 |
| 68           | -          | 2                  | 0  | 1  | 0  | 1  | 0 |
|              | +          | 1                  | 0  | 1  | 1  | 2  | 1 |
| <b>TOTAL</b> |            | 85                 | 94 | 31 | 19 | 12 | 6 |
