# Supplementary material for: High-risk HPV genotypes in Zimbabwean women with cervical cancer: Comparative analyses between HIV-negative and HIV-positive women
Source: PubMed Central journal article supplement (PMC8478215; doi:10.1371/journal.pone.0257324), 2021-09-28
Supplement: pone.0257324.s003.pdf [file pone.0257324.s003.pdf]

| HPV genotypes* | OR (95% CI)    | p               |
|----------------|----------------|-----------------|
| 16/18          | 0.3 (0.1-0.5)  | <b>&lt;0.01</b> |
| 16/33          | 0.4 (0.2-1.0)  | 0.05            |
| 16/35          | 3.6 (1.8-7.2)  | <b>&lt;0.01</b> |
| 35/51          | 8.8 (2.3-34.3) | <b>&lt;0.01</b> |
| 35/52          | 0.5 (0.1-4.3)  | 0.50            |
| 39/51          | 4.2 (0.7-25.9) | 0.12            |
| 39/56          | 9.5 (1.1-82.9) | <b>0.04</b>     |

\*multivariate analysis for the co-segregation of HPV genotypes, taking into consideration age, history of STI, parity, HIV status, age of sexual debut, tumour histology.
